# Supplementary material
Source: PubMed Central journal article supplement (PMC5527656)
Supplement: AAC.00744-17_zac008176375s1.pdf [file AAC.00744-17_zac008176375s1.pdf]

## SUPPLEMENTAL MATERIAL

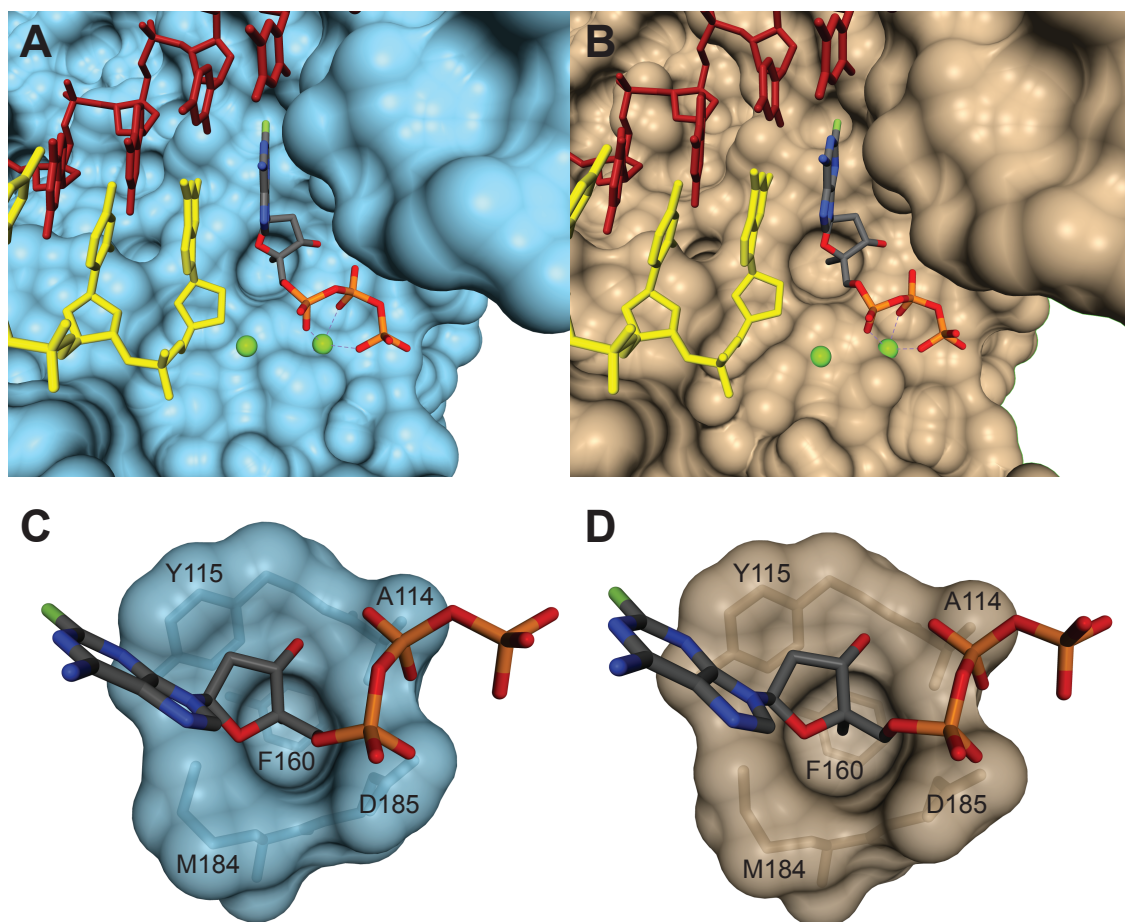

**Figure S1.** Positioning of MK-8591-TP in the polymerase active site of HIV-1 RT (A and C) and in a molecular model of the HIV-2 RT/inhibitor complex (B and D). In all four panels, the inhibitor is rendered in Corey-Pauling-Koltun-colored sticks and is shown as the incoming nucleotide substrate (i.e., the N-site complex). Catalytic magnesium ions are represented as green spheres. Template and nascent nucleic acid strands are shown in dark red and yellow, respectively. In panels A and C, portions of the fingers and palm subdomains of RT have been omitted to obtain an unobstructed view of the active site. Atomic coordinates for the HIV-1 RT structure

are from Protein Data Bank file 5J2M (1). The structure shown in panels B and D was generated by homology modeling (using 5JM2 as the reference structure) as previously described (2) and was energy minimized using the YASARA force field ([www.yasara.org/minimizationserver.htm](http://www.yasara.org/minimizationserver.htm)) (3). All illustrations were generated in UCSF Chimera (version 1.11.2; University of California, San Francisco, CA) (4).

## References

1. **Salie ZL, Kirby KA, Michailidis E, Marchand B, Singh K, Rohan LC, Kodama EN, Mitsuya H, Parniak MA, Sarafianos SG.** 2016. Structural basis of HIV inhibition by translocation-defective RT inhibitor 4'-ethynyl-2-fluoro-2'-deoxyadenosine (EFdA). *Proc Natl Acad Sci U S A* **113**:9274-9279.
2. **Smith RA, Raugi DN, Wu VH, Leong SS, Parker KM, Oakes MK, Sow PS, Ba S, Seydi M, Gottlieb GS, University of Washington-Dakar HIVSG.** 2015. The nucleoside analog BMS-986001 shows greater in vitro activity against HIV-2 than against HIV-1. *Antimicrob Agents Chemother* **59**:7437-7446.
3. **Krieger E, Joo K, Lee J, Lee J, Raman S, Thompson J, Tyka M, Baker D, Karplus K.** 2009. Improving physical realism, stereochemistry, and side-chain accuracy in homology modeling: Four approaches that performed well in CASP8. *Proteins* **77 Suppl 9**:114-122.
4. **Pettersen EF, Goddard TD, Huang CC, Couch GS, Greenblatt DM, Meng EC, Ferrin TE.** 2004. UCSF Chimera--a visualization system for exploratory research and analysis. *J Comput Chem* **25**:1605-1612.

**Table S1. Susceptibility of HIV-1<sub>NL4-3</sub> and HIV-2<sub>ROD9</sub> to additional ARV drugs.**

| HIV clone <sup>b</sup> | EC <sub>50</sub> (nM) <sup>a</sup> |               |              |               |
|------------------------|------------------------------------|---------------|--------------|---------------|
|                        | Raltegravir                        | d4T           | AZT          | TDF           |
| HIV-1 <sub>NL4-3</sub> | 11 ± 1.4 (5)                       | 800 ± 300 (5) | 29 ± 11 (2)  | 13 ± 1.3 (3)  |
| HIV-2 <sub>ROD9</sub>  | 13 ± 7.2 (7)                       | 800 ± 470 (4) | 28 ± 3.2 (2) | 6.4 ± 1.3 (4) |

<sup>a</sup> EC<sub>50</sub>, 50% effective concentration in the MAGIC-5A single-cycle assay. Values are means ± standard deviations. Values in parentheses indicate the number of independent dose-response assays performed for each inhibitor. Abbreviations are as follows: d4T, stavudine; AZT, zidovudine; TDF, tenofovir disoproxil fumarate.

<sup>b</sup> Viruses produced from full-length plasmids pNL4-3 and pROD9.

**Table S2. Susceptibilities of HIV-2 RT mutants to raltegravir.**

| HIV clone <sup>a</sup>     | Genotype <sup>b</sup>       | EC <sub>50</sub> (nM) <sup>c</sup> | n <sup>d</sup> | Fold change <sup>e</sup> |
|----------------------------|-----------------------------|------------------------------------|----------------|--------------------------|
| HIV-2 <sub>ROD9</sub>      | wild-type                   | 13 ± 7.2                           | 7              |                          |
|                            | K65R                        | 12 ± 1.4                           | 3              | 0.9                      |
|                            | M184V                       | 9.7 ± 4.7                          | 3              | 0.7                      |
|                            | K65R+Q151M                  | 8.2 ± 2.5                          | 3              | 0.6                      |
|                            | Q151M+M184V                 | 16 ± 1.9                           | 3              | 1.2                      |
|                            | K65R+Q151M+M184V            | 15 ± 6.6                           | 4              | 1.2                      |
|                            | K65R+K70R+Q151M+M184V       | 12 ± 3.8                           | 3              | 0.9                      |
|                            | K65R+Y115F+Q151M+M184V      | 16 ± 8.9                           | 4              | 1.2                      |
| HIV-2 <sub>ROD9-4.7a</sub> | K65R+N69S+V111I+Q151M+M184V | 15 ± 1.5                           | 3              | 1.2                      |

<sup>a</sup> Viruses produced from full-length plasmids pROD9, and patient-derived clone pROD9-4.7a.

<sup>b</sup> Amino acid changes listed for HIV-2<sub>ROD9</sub> were engineered by site-directed mutagenesis. Changes listed for HIV-2<sub>ROD9-4.7a</sub> were encoded by a *pol* gene segment that was PCR-amplified from an HIV-2-infected patient (see text for details).

<sup>c</sup> EC<sub>50</sub>, 50% effective concentrations measured in the MAGIC-5A single-cycle assay. Values are means ± standard deviations.

<sup>d</sup> Number of independent dose-response assays performed for each strain.

<sup>e</sup> EC<sub>50</sub> for the mutant divided by the EC<sub>50</sub> for wild-type HIV-2<sub>ROD9</sub>.
